# Supplementary material for: Onychomycosis in Foot and Toe Malformations
Source: Preprints.org preprint supplement (doi:10.20944/preprints202404.0676.v1), 2024-04-10
Supplement: Supplementary file 1 [file supplementary]

Tables

**Table** 1. Demographic data

Gender Female 84 (45.4%) Male 101*(54.6%)

Age [years]

0 – 9 1 1

10 – 19 4 2

20 – 29 9 10

30 – 39 11 5

40 – 49 22 23

1. – 60 19 24

60 – 69 13 20

70 – 79 5 14

> 80 0 1

* The age could not be retrieved in one male patient.

**Table 2**. Results

|  | Number | Percent |
| --- | --- | --- |
| Normal straight toe | 9 | 5 |
| Hallux valgus (HV) | 105 | 58.6 |
| Hallux valgus interphalangeus (HVI) | 143 | 78.1 |
| HV plus HVI | 83 | 44.9 |
| Hallux erectus (HE) | 43 | 23.2 |
| HV + HVI + HE | 25 | 10.8 |
| HVI + HE | 6 | 3.2 |
